# Supplementary material
Source: PubMed Central journal article supplement (PMC2821953)

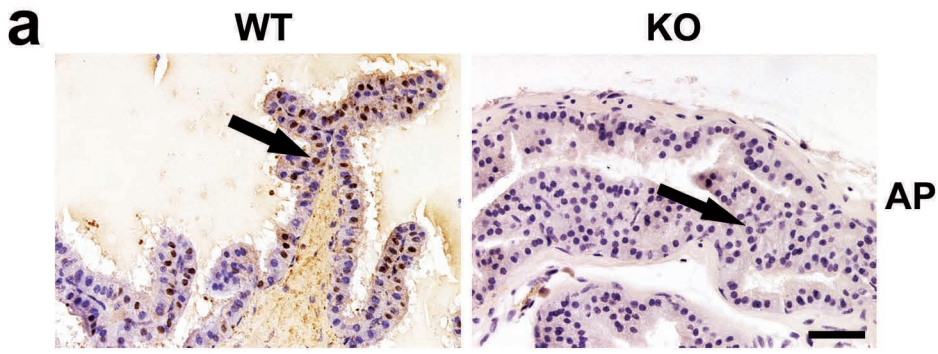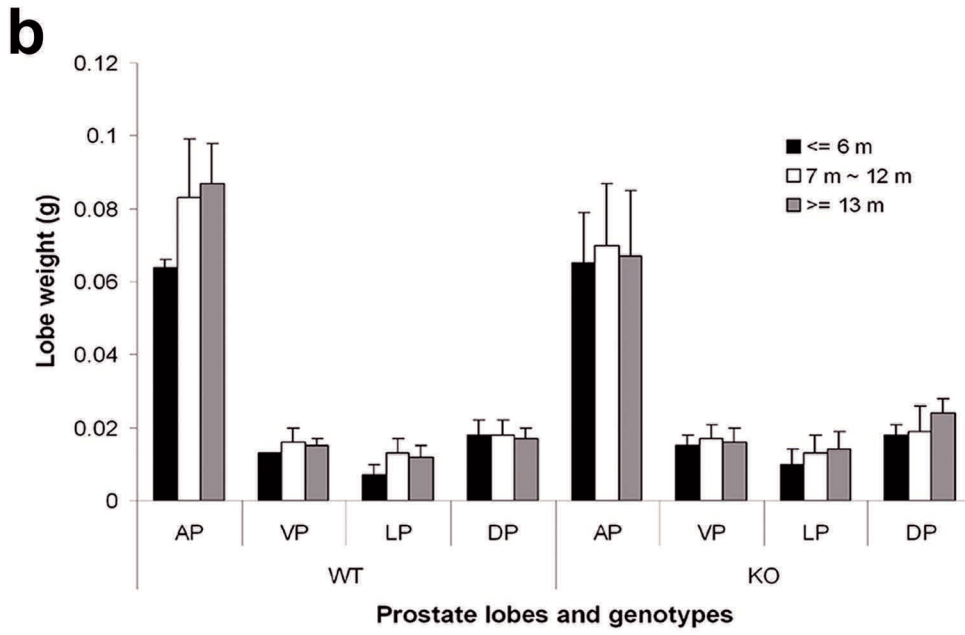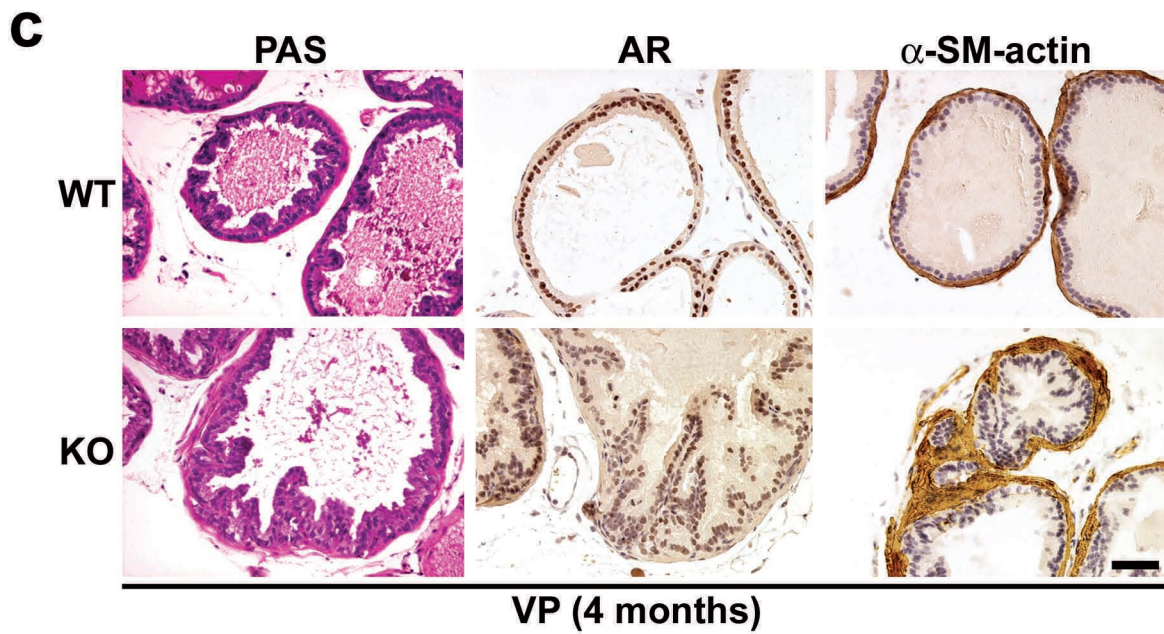

Supplement: NIHMS143868-supplement-2.pdf [file NIHMS143868-supplement-2.pdf]

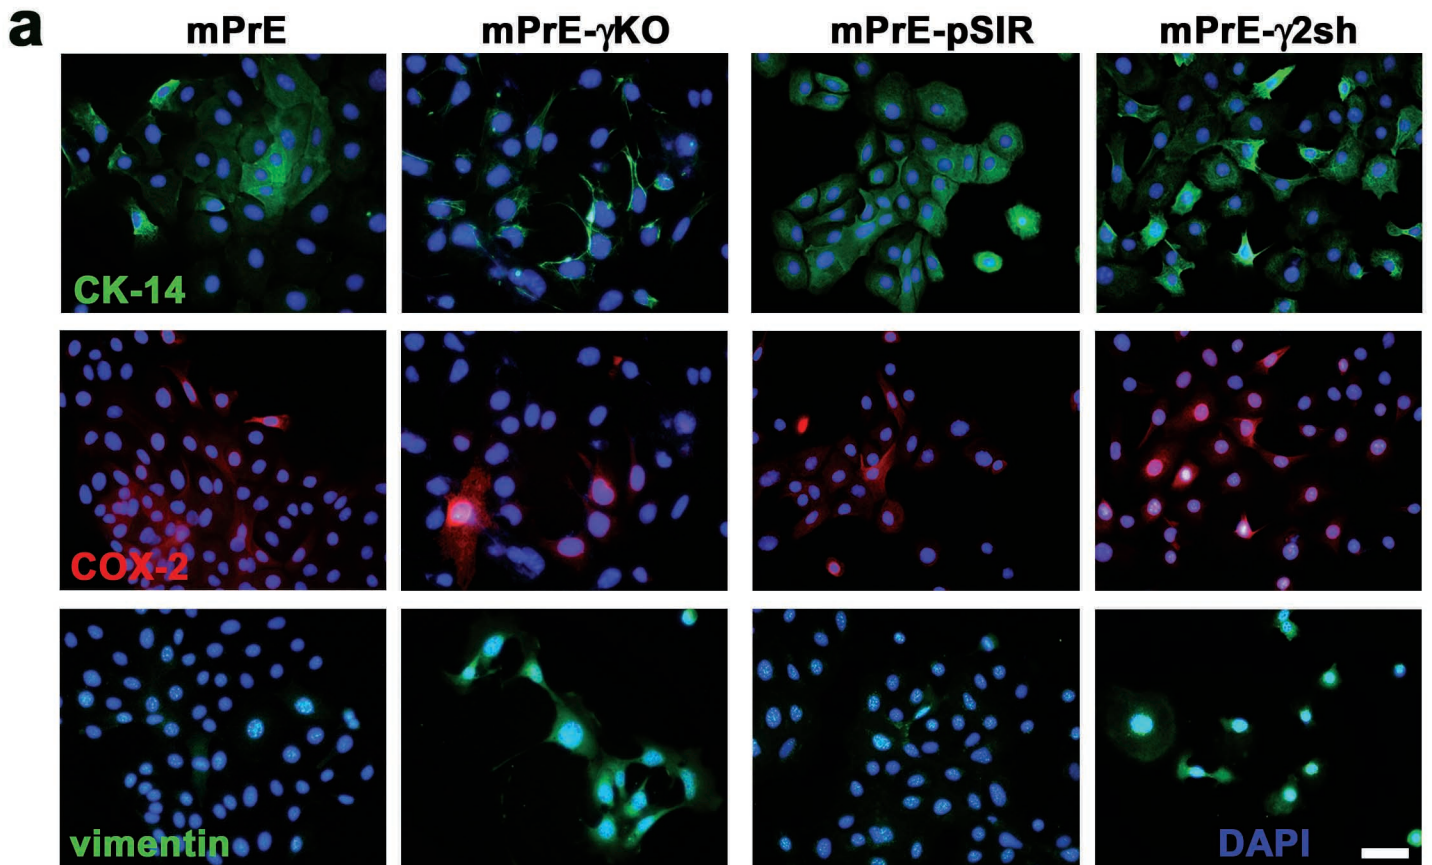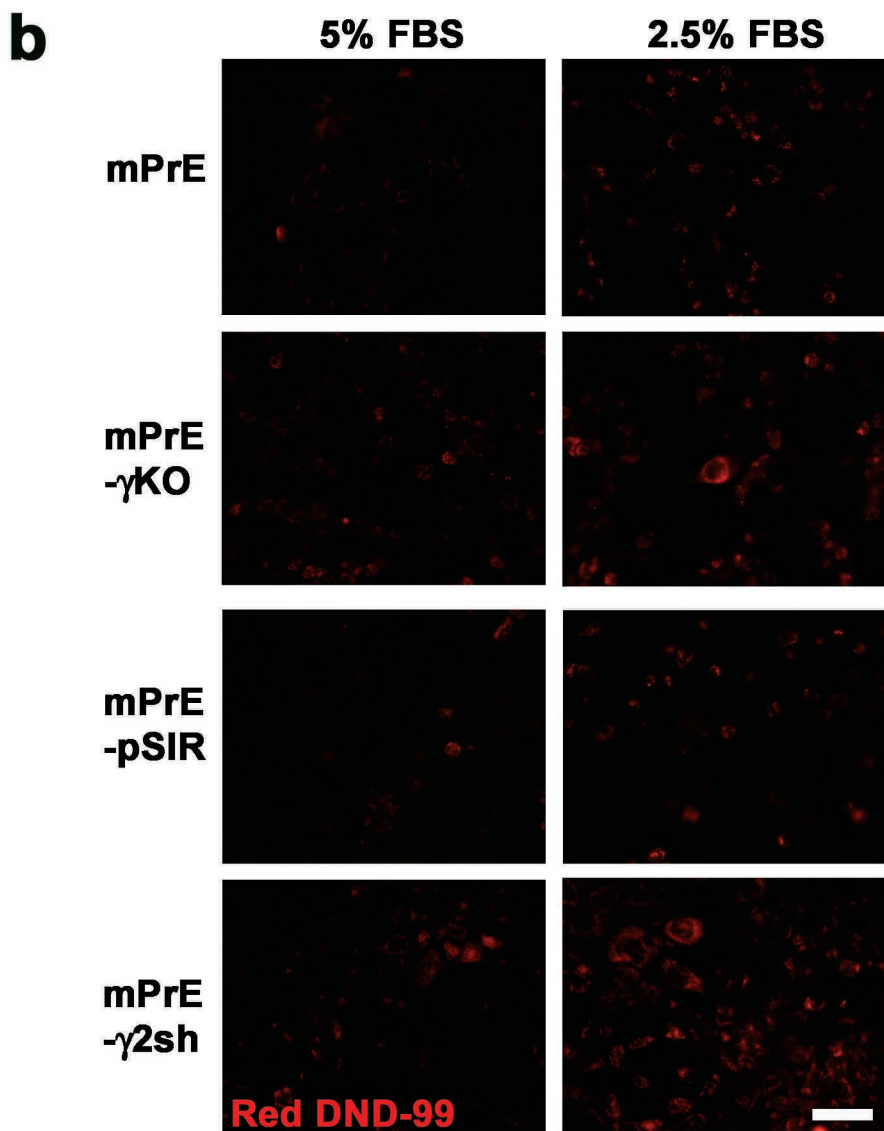

Supplement: NIHMS143868-supplement-3.pdf [file NIHMS143868-supplement-3.pdf]

**a**

**mPrE- $\gamma$ KO vs. mPrE**

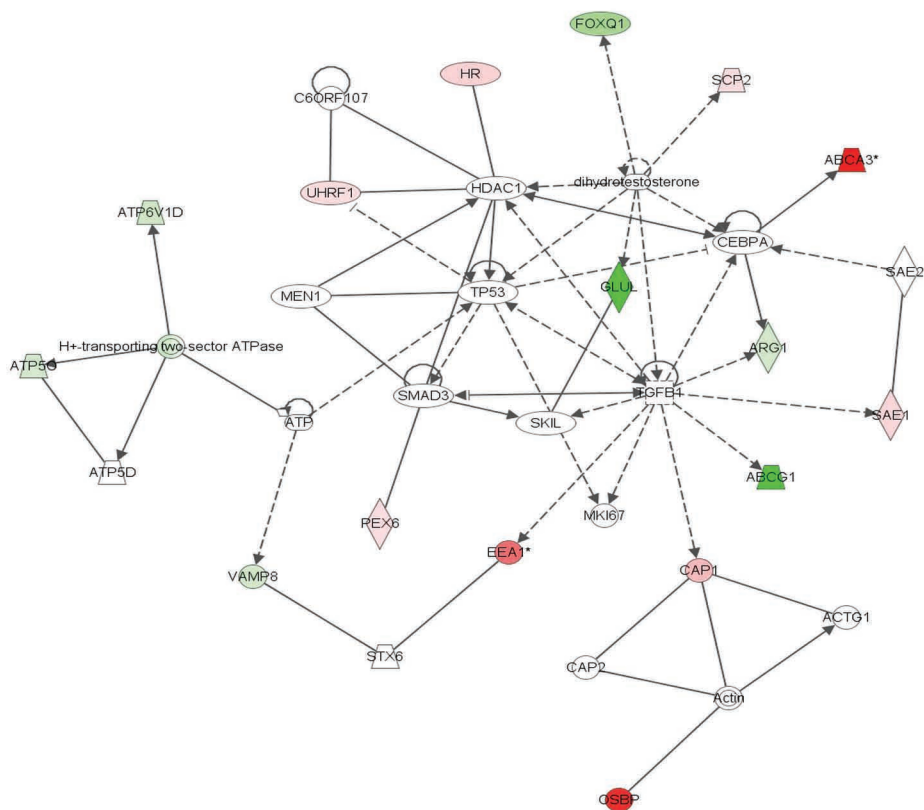

**b**

**mPrE- $\gamma$ 2sh vs. mPrE-pSIR**

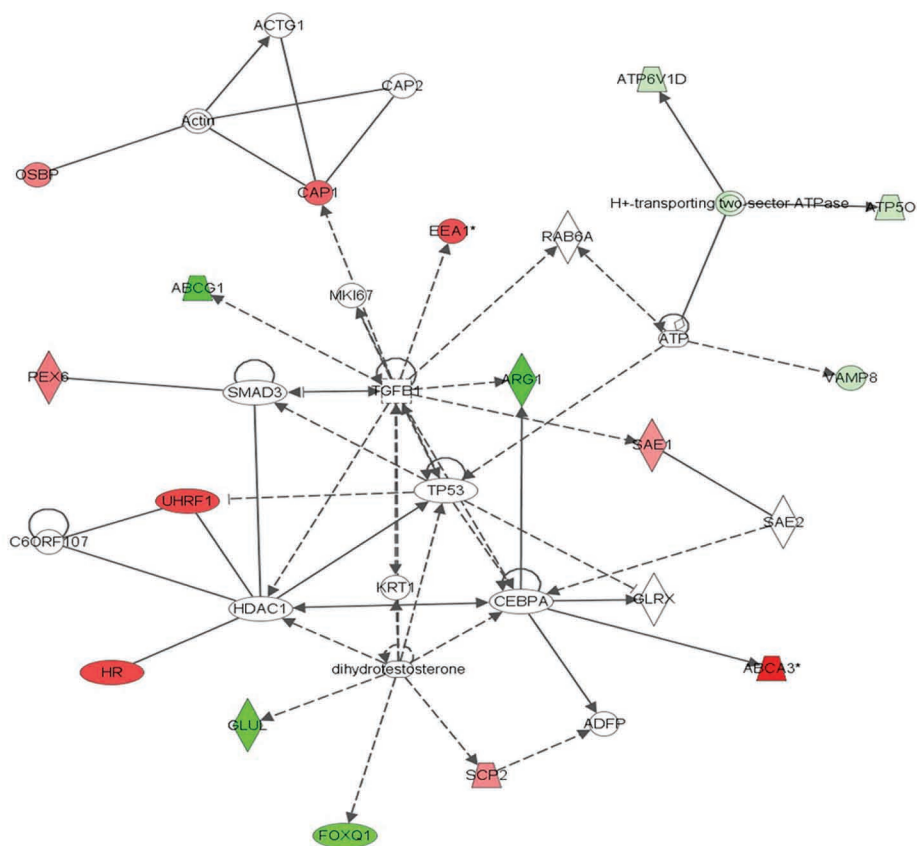

**Metabolism pathway (Oxidative stress)**

Supplement: NIHMS143868-supplement-4.pdf [file NIHMS143868-supplement-4.pdf]

**a**

**mPrE- $\gamma$ KO vs. mPrE**

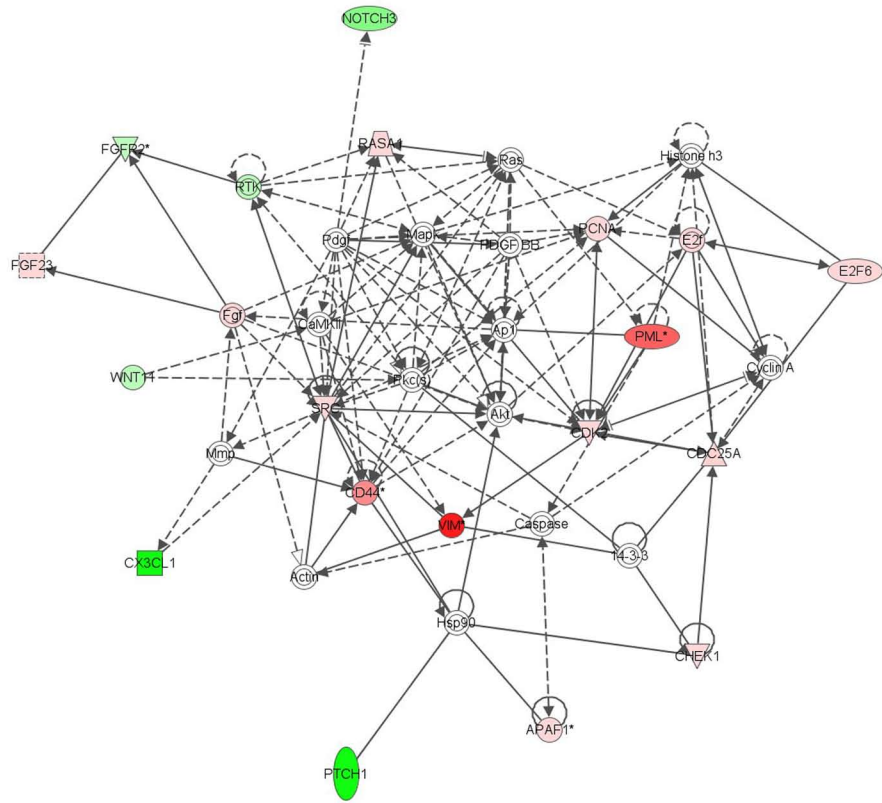

**b**

**mPrE- $\gamma$ 2sh vs. mPrE-pSIR**

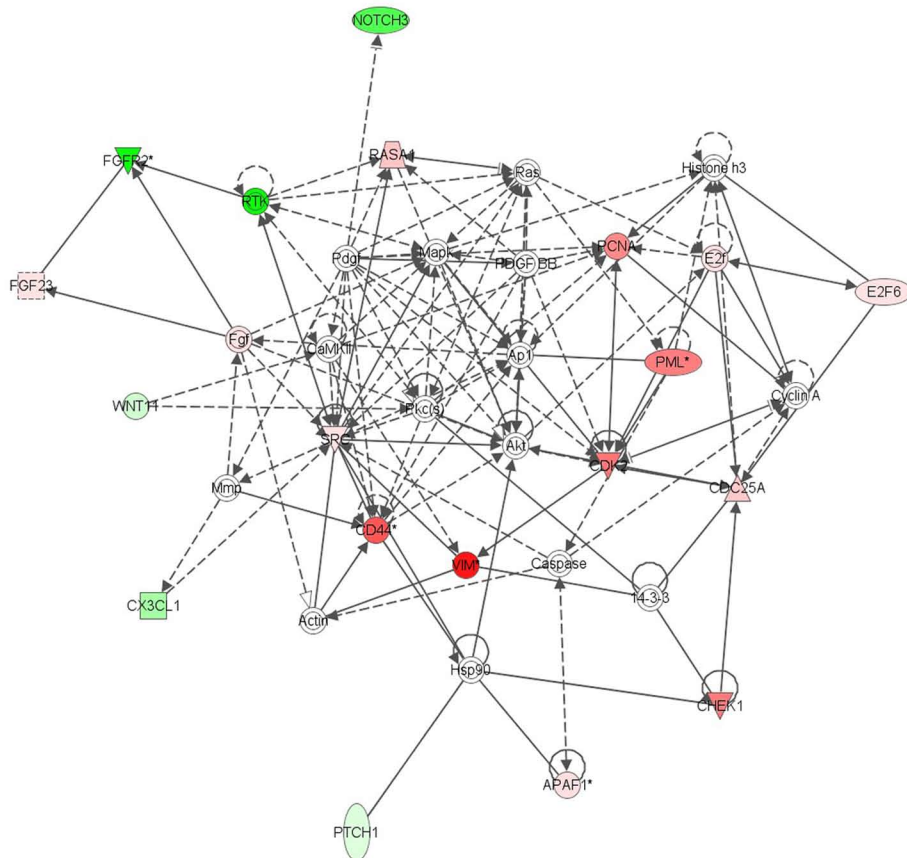

**Cell Cycle Control (Dedifferentiation)**

Supplement: NIHMS143868-supplement-5.pdf [file NIHMS143868-supplement-5.pdf]

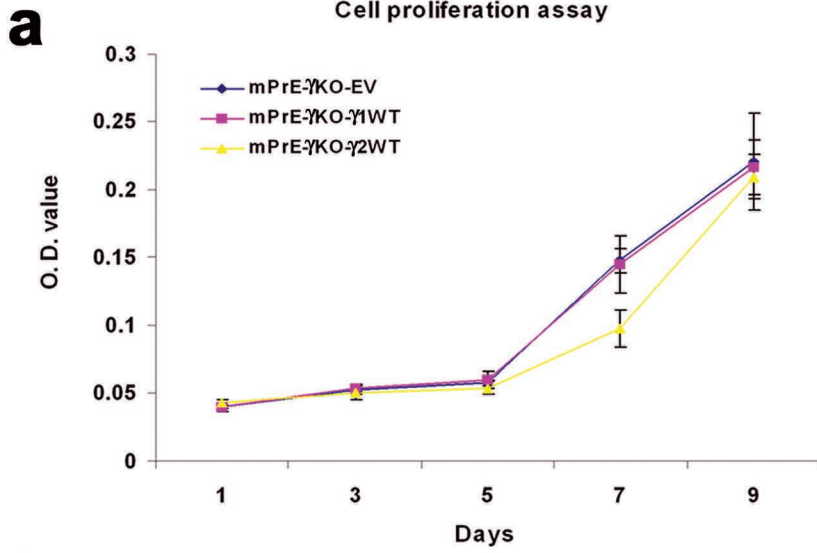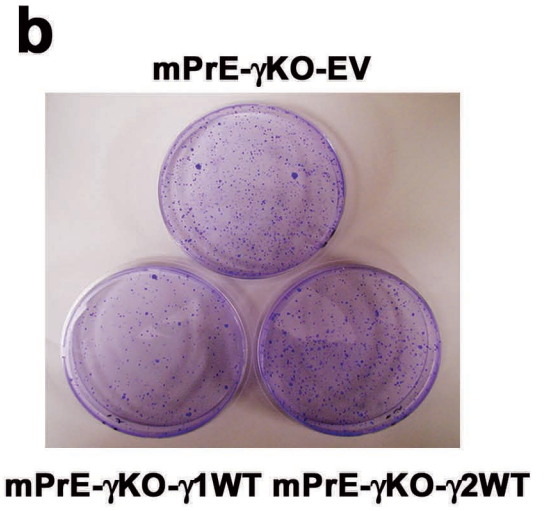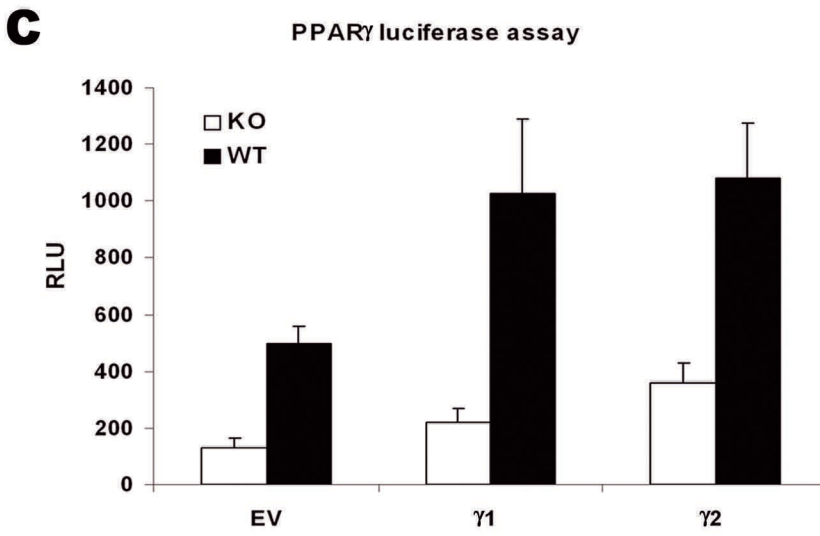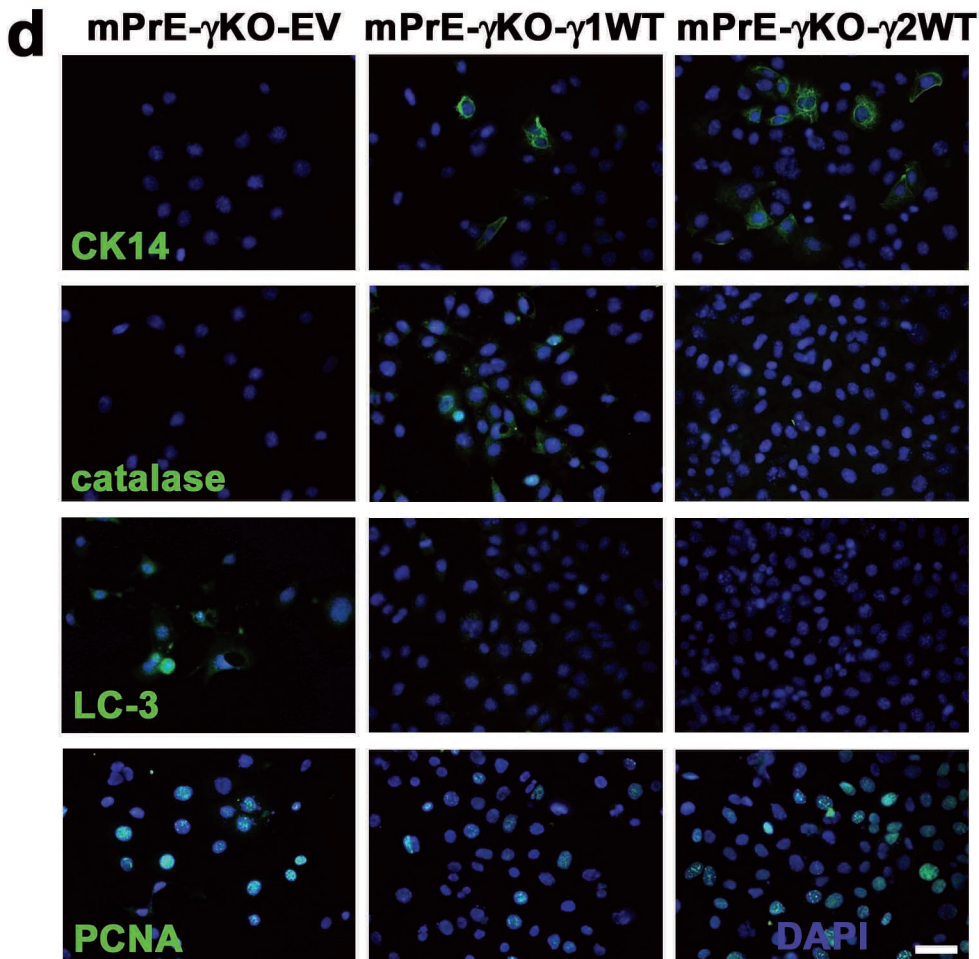

Supplement: NIHMS143868-supplement-6.pdf [file NIHMS143868-supplement-6.pdf]
